# Supplementary material
Source: PubMed Central journal article supplement (PMC9127013)

**Article title:** Towards a better implementation of treat-to-target strategy in rheumatoid arthritis: a comparison of two real-world cohorts

**Authors and affiliations:**

Hong Huang PhD, Wenhui Xie PhD, Yan Geng MD, Yong Fan PhD, Yu Wang MD, Juan Zhao MD, Zhuoli Zhang MD, PhD.

Department of Rheumatology and Clinical Immunology, Peking University First Hospital, Beijing 100034, China

**Correspondence to:**

Prof. Dr. Zhuoli Zhang, MD. PhD,

Department of Rheumatology and Clinical Immunology,

Peking University First Hospital,

Beijing 100034, China.

[zhuoli.zhang@126.com](mailto:zhuoli.zhang@126.com)

Supplementary Materials Table S1. DAS and CDAI scores of the two cohorts during follow up, median (IQR)

|                   | Unmatched cohort                    |           |                                      |           |         | Matched cohort                      |           |                                      |           |         |
|-------------------|-------------------------------------|-----------|--------------------------------------|-----------|---------|-------------------------------------|-----------|--------------------------------------|-----------|---------|
|                   | TARRA cohort<br>(n=389 at baseline) |           | CENTRA cohort<br>(n=111 at baseline) |           | p value | TARRA cohort<br>(n=271 at baseline) |           | CENTRA cohort<br>(n=102 at baseline) |           | p value |
| DAS28 at 3-month  | n=343                               | 3 (1.7)   | n=106                                | 2.3 (1.3) | 0.001   | n=241                               | 3 (1.8)   | n=97                                 | 2.3 (1.2) | 0.001   |
| CDAI at 3-month   | n=343                               | 6 (7)     | n=106                                | 3.3 (5)   | < 0.001 | n=241                               | 6 (7)     | n=97                                 | 3 (4)     | < 0.001 |
| DAS28 at 6-month  | n=365                               | 2.6 (1.4) | n=102                                | 2.3 (1.3) | 0.007   | n=253                               | 2.6 (1.6) | n=93                                 | 2.3 (1.3) | 0.005   |
| CDAI at 6-month   | n=365                               | 4 (6)     | n=102                                | 3 (5.5)   | 0.002   | n=253                               | 4 (6)     | n=93                                 | 3 (5.5)   | 0.001   |
| DAS28 at 12-month | n=365                               | 2.4 (1.4) | n=111                                | 2 (1.3)   | < 0.001 | n=271                               | 2.4 (1.5) | n=102                                | 2 (1.2)   | < 0.001 |
| CDAI at 12-month  | n=389                               | 2.5 (4)   | n=111                                | 2 (4)     | < 0.001 | n=271                               | 3 (4)     | n=102                                | 1.8 (3.6) | < 0.001 |
| DAS28 at 24-month | n=283                               | 2.2 (1.1) | n=67                                 | 2 (1)     | 0.012   | n=185                               | 2.2 (1.1) | n=62                                 | 2 (1)     | 0.014   |
| CDAI at 24-month  | n=283                               | 2 (3)     | n=67                                 | 1 (3.5)   | 0.003   | n=185                               | 2 (3)     | n=62                                 | 1 (3)     | 0.002   |

Supplementary Materials Figure S1. Trends in disease activity scores according to DAS28 (A) and CDAI (B) over 2 years in the TARRA cohort and CENTRA cohort.

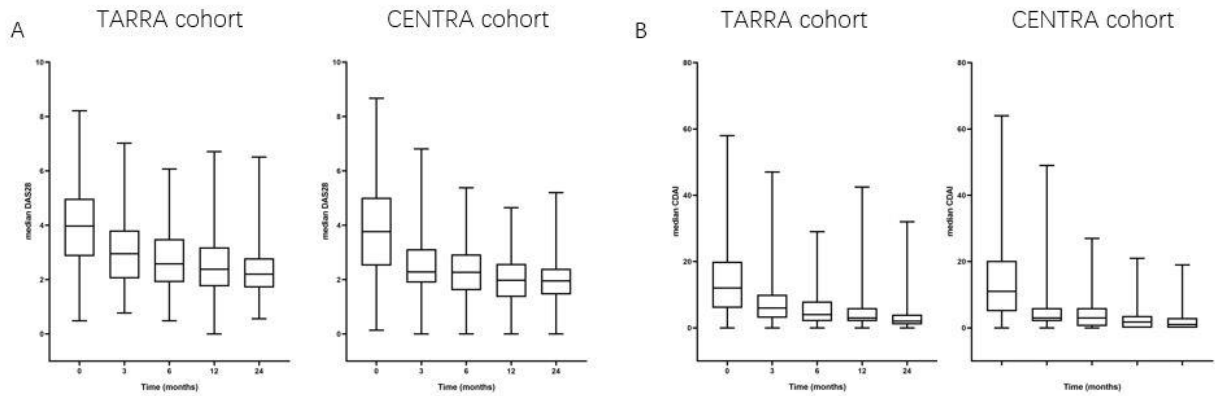

Supplementary Materials Figure 2. Trends in the percentage of remission, low, moderate and high disease activity over 2 years by DAS28 (A) and CDAI (B) in the TARRA and CENTRA cohort.

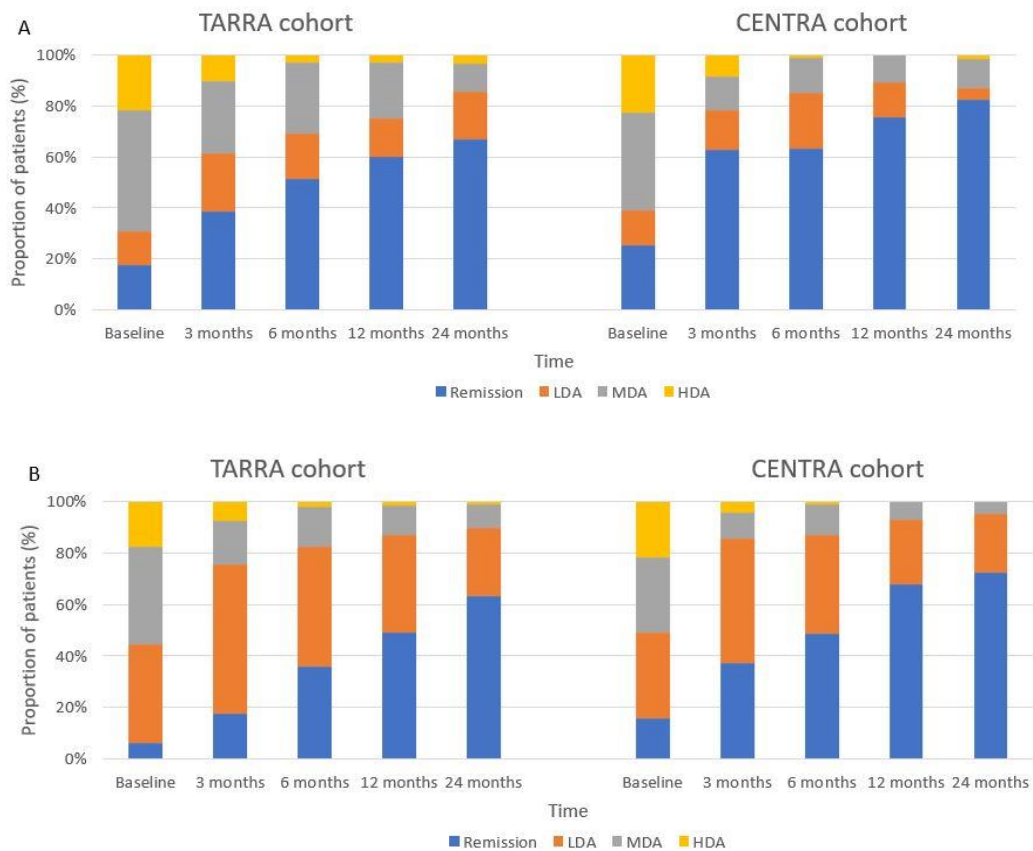

Supplement: 40744_2022_441_MOESM1_ESM.pdf [file 40744_2022_441_MOESM1_ESM.pdf]
